# Supplementary material for: Understanding multiscale structure–property correlations in PVDF-HFP electrospun fiber membranes by SAXS and WAXS
Source: Royal Society of Chemistry journal article supplement (doi:10.1039/d1na00503k), 2021-11-15
Supplement: d1na00503k1.pdf [file d1na00503k1.pdf]

# Understanding multiscale structure-property correlations in PVDF-HFP electrospun fiber membranes by SAXS and WAXS

Anjani K. Maurya<sup>1, 2, 3</sup>, Eloïse Mias<sup>1</sup>, Jean Schoeller<sup>2,4</sup>, Ines E. Collings<sup>1</sup>, René M. Rossi<sup>2,4</sup>, Alex Dommann<sup>1,3</sup>, Antonia Neels\*<sup>1,5</sup>

<sup>1</sup>*Empa, Swiss Federal Laboratories for Materials Science and Technology, Center for X-Ray Analytics, Lerchenfeldstrasse 5, 9014 St. Gallen, Switzerland*

<sup>2</sup>*Empa, Swiss Federal Laboratories for Materials Science and Technology, Laboratory for Biomimetic Membranes and Textiles, Lerchenfeldstrasse 5, 9014 St. Gallen, Switzerland*

<sup>3</sup>*ARTORG Center for Biomedical Engineering Research, University of Bern, Murtenstrasse 50, 3008 Bern, Switzerland*

<sup>4</sup>*ETH Zürich, Department of Health Science and Technology, 8092 Zürich, Switzerland*

<sup>5</sup>*Department of Chemistry, University of Fribourg, Avenue de l'Europe 20, 1700 Fribourg, Switzerland*

**\*Corresponding author:**

Antonia Neels, Email: [antonia.neels@empa.ch](mailto:antonia.neels@empa.ch)  
Empa, Swiss Federal Laboratories for Materials Science and Technology  
Center for X-Ray Analytics,  
Lerchenfeldstrasse 5, 9014  
St. Gallen, Switzerland

### S1. Macoscopic image of the fiber membrane

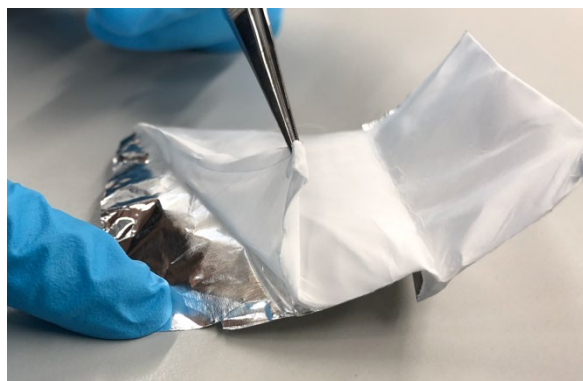

Figure S1: Image of the electrospun fibers membrane.

### S2. Peak indexing based simulated $\alpha$ and $\beta$ phases of PVDF

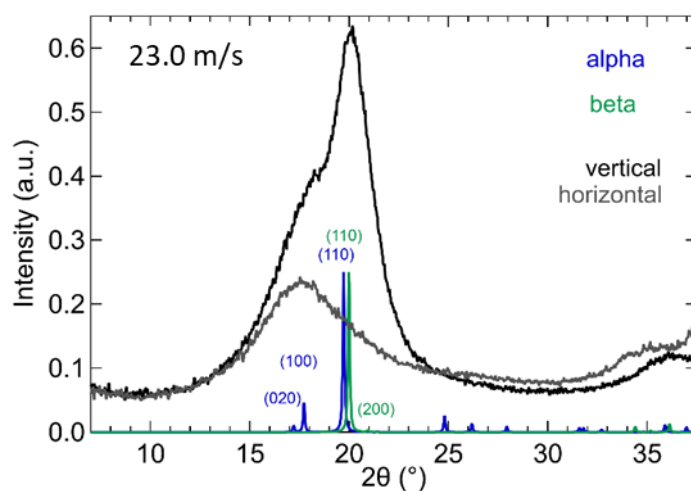

Figure S2. The diffraction of the fiber membrane produced at 23.0 m/s rotating speed integrated with a 30° wedge in the vertical (black line) and horizontal (grey line) directions. The simulated profiles of the alpha and beta phases are also shown with a preferred orientation down the (110) direction with a March-Dollase parameter of 0.5 using the Mercury software.

### S3. The area under peaks determined by fitting of the WAXD data

Table S1: The determined area under peaks from the fitting of the WAXD data and calculated percentage of  $\alpha$ - and  $\beta$ -phases.

| Area <sub>sample</sub> | Amorphous | (100/020) <sub><math>\alpha</math></sub> | (110) <sub><math>\alpha</math></sub> | (110/200) <sub><math>\beta</math></sub> | (021/111/120) <sub><math>\alpha</math></sub> |
|------------------------|-----------|------------------------------------------|--------------------------------------|-----------------------------------------|----------------------------------------------|
| A <sub>0.5m/s</sub>    | 0.40      | 0.71                                     | 0.45                                 | 0.08                                    | 0.10                                         |
| A <sub>23.0m/s</sub>   | 0.95      | 0.71                                     | 0.02                                 | 0.82                                    | 0.06                                         |

| Area (total $\alpha$ + $\beta$ phases) | Area ( $\beta$ phase) | Area (total $\alpha$ phase) | % $\beta$ | % $\alpha$ |
|----------------------------------------|-----------------------|-----------------------------|-----------|------------|
| 1.34                                   | 0.08                  | 1.26                        | 6         | 94         |
| 1.61                                   | 0.82                  | 0.79                        | 51        | 49         |

#### S4. Fourier-transform infrared spectroscopy (FTIR)

FTIR measurements were performed on a Bruker Vertex 80 FTIR spectrometer. For each sample, spectra were recorded at a range of 700 to 1500  $\text{cm}^{-1}$ . The spectrometer was equipped with 3 integrated spheres, one for reflectance measurements in the solar range (0.3 to 2.5  $\mu\text{m}$ ). The IR detector was cooled with liquid nitrogen. FTIR provides information about the chemical composition of the materials. Therefore, it was used for quantifying the different phases of the PVDF-HFP.

The IR spectras were compared to the literature [1-3].

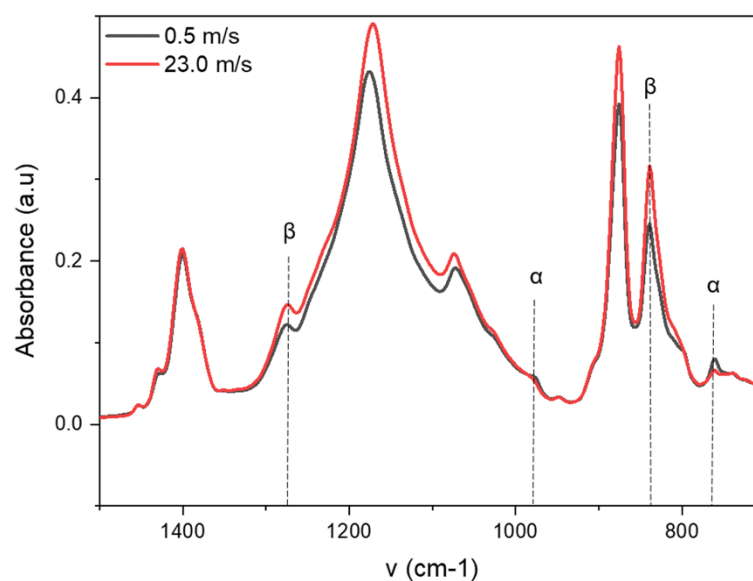

Figure S3: FTIR spectra of the electrospun fiber membrane produced at 0.5 m/s and 23.0 m/s rotating drum speed.

The  $\beta$  phase of PVDF-HFP is well-known to exhibit the highest electroactive properties [4] . According to figure S4, the PVDF-HFP electrospun fibers produced at 23.0 m/s contained more  $\beta$  phase than the electrospun membrane at 0.5 m/s speed. The membrane produced at 23.0 m/s exhibit high intensity at the wavenumbers of  $1275\text{ cm}^{-1}$  and  $840\text{ cm}^{-1}$ , which corresponds the main peaks for the  $\beta$  phase compared to membrane produced at 0.5 m/s speed. Moreover, at the wavenumbers of  $980\text{ cm}^{-1}$  and  $760\text{ cm}^{-1}$ , which are the main peaks for  $\alpha$ -phase, non aligned fibers produced at 0.5 m/s speed has higher intensity compared to aligned fiber membranes produced at 23.0 m/s.

## References

1. Gheibi, A., et al., *Electrical power generation from piezoelectric electrospun nanofibers membranes: electrospinning parameters optimization and effect of membranes thickness on output electrical voltage*. Journal of Polymer Research, 2014. **21**(11): p. 14.
2. Lancers-Mendez, S., et al., *FTIR and DSC studies of mechanically deformed beta-PVDF films*. Journal of Macromolecular Science-Physics, 2001. **B40**(3-4): p. 517-527.
3. Salimi, A. and A.A. Yousefi, *FTIR studies of beta-phase crystal formation in stretched PVDF films*. Polymer Testing, 2003. **22**(6): p. 699-704.
4. Mokhtari, F., M. Latifi, and M. Shamsirsaz, *Electrospinning/electrospray of polyvinylidene fluoride (PVDF): piezoelectric nanofibers*. Journal of the Textile Institute, 2016. **107**(8): p. 1037-1055.
